# Supplementary material for: BiVO4 Photoanodes Modified with Synergetic Effects between Heterojunction Functionalized FeCoOx and Plasma Au Nanoparticles
Source: MDPI journal article supplement (doi:10.3390/catal13071063), 2023-07-01
Supplement: s1 [file s1]

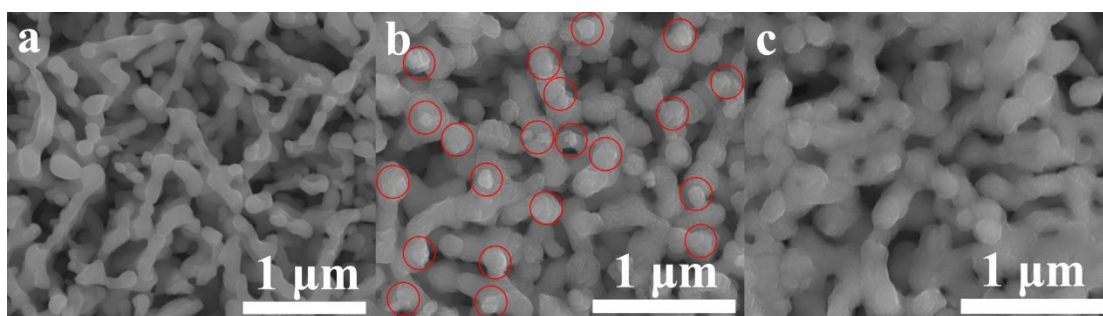

**Figure S1.** SEM images of (a) BiVO<sub>4</sub>, (b) BiVO<sub>4</sub>/Au, and (c) BiVO<sub>4</sub>/FeCoO<sub>x</sub>.

**Table S1.** Content Information of Each Element in Mapping of BiVO<sub>4</sub>/Au/FeCoO<sub>x</sub>.

| Element | Mass(%) | Atomic(%) |
|---------|---------|-----------|
| Bi      | 63.66   | 20.58     |
| V       | 19.58   | 25.96     |
| O       | 11.96   | 50.49     |
| Au      | 3.23    | 1.11      |
| Fe      | 1.06    | 1.28      |
| Co      | 0.51    | 0.58      |

**Table S2.** Peak position and atomic content in XPS results.

| Peak                 | Location(eV) | Atomic(%) |
|----------------------|--------------|-----------|
| O <sub>L</sub>       | 530.45       | 44.11     |
| O <sub>V</sub>       | 531.55       | 7.99      |
| O <sub>C</sub>       | 532.35       | 7.91      |
| Au 4f <sub>7/2</sub> | 83.82        | 1.26      |
| Au 4f <sub>5/2</sub> | 87.51        | 1.41      |
| Bi 4f <sub>7/2</sub> | 159.11       | 5.41      |
| Bi 4f <sub>5/2</sub> | 164.41       | 4.13      |
| Co <sup>3+</sup>     | 779.60       | 0.66      |
| Co <sup>2+</sup>     | 780.60       | 2.37      |
| Co 2p <sub>1/2</sub> | 795.74       | 2.29      |
| Co sat-1             | 787.88       | 0.57      |
| Co sat-2             | 804.32       | 0.86      |
| Co sat-3             | 786.10       | 0.12      |
| Fe <sup>2+</sup>     | 710.31       | 1.60      |
| Fe <sup>3+</sup>     | 712.42       | 3.03      |
| Fe 2p <sub>1/2</sub> | 723.97       | 2.05      |
| Fe sat-1             | 716.17       | 1.44      |
| Fe sat-2             | 719.45       | 1.13      |
| Fe sat-3             | 732.51       | 0.15      |
| V 2p <sub>3/2</sub>  | 516.70       | 5.21      |
| V 2p <sub>1/2</sub>  | 524.16       | 1.59      |
| V sat-1              | 529.69       | 6.71      |

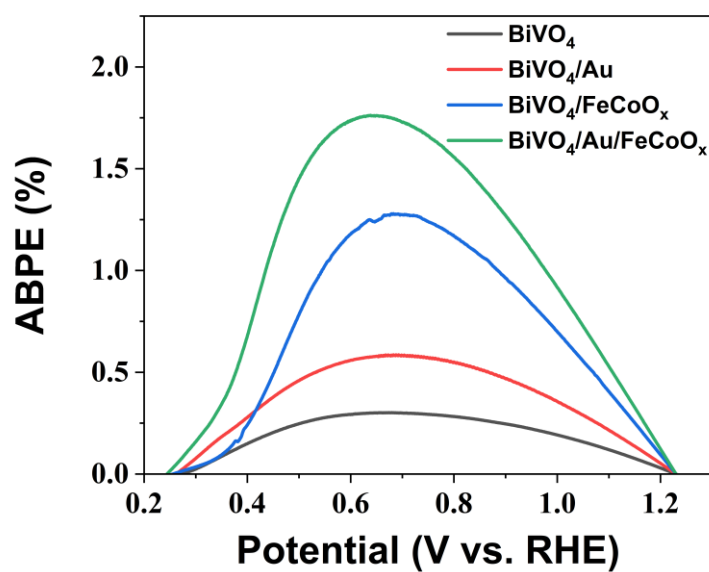

Figure S2. ABPE curves of photoanodes in 0.5 M potassium phosphate buffer (pH = 7.0) under AM 1.5G ( $100 \text{ mW cm}^{-2}$ ).

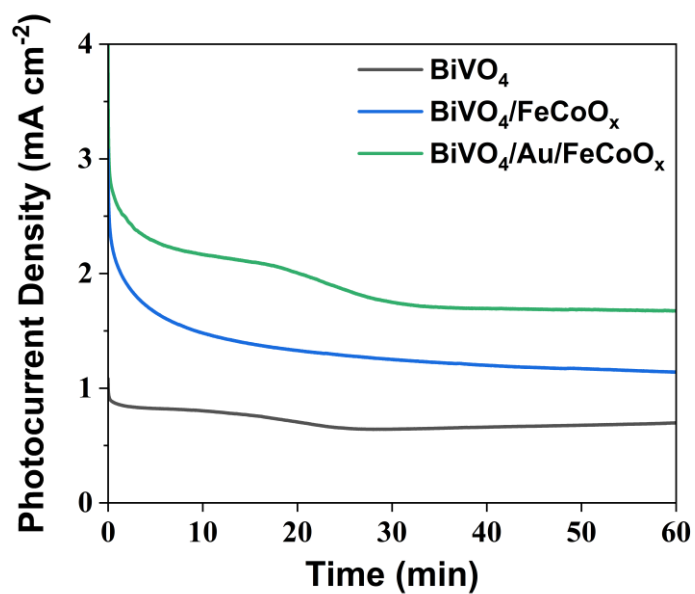

Figure S3. Durability tests of photoanodes in 0.5 M potassium phosphate buffer (pH = 7.0) under AM 1.5G ( $100 \text{ mW cm}^{-2}$ ) at 1.23 V vs. RHE.
